# Supplementary material for: Emergency Department Visits Before, After and During Integrated Home Care: A Time Series Analyses in Italy
Source: PubMed Central journal article supplement (PMC10105177; doi:10.34172/ijhpm.2022.6662), 2022-05-29
Supplement: ijhpm-11-3012-s001.pdf [file ijhpm-11-3012-s001.pdf]

**Article title:** Emergency Department Visits Before, After and During Integrated Home Care: A Time Series Analyses in Italy

**Journal name:** International Journal of Health Policy and Management (IJHPM)

**Authors' information:** Sara Campagna<sup>1</sup>, Alessio Conti<sup>1</sup>, Valerio Dimonte<sup>1</sup>, Paola Berchiolla<sup>2</sup>, Alberto Borraccino<sup>1\*</sup>, Maria Michela Gianino<sup>1</sup>

<sup>1</sup>Department of Public Health and Pediatrics, University of Torino, Torino, Italy.

<sup>2</sup>Department of Clinical and Biological Sciences, University of Torino, Torino, Italy

(\*Corresponding author: Email: [alberto.borraccino@unito.it](mailto:alberto.borraccino@unito.it))

### Supplementary file 1

**Table S1.** ED visits characteristics before, during and after IHC, stratified by short, intermediate and long IHC duration. Piedmont Region 2012-2017, Italy

|                                 | SHORT IHC DURATION (n=27 417) |                     |                    |         | INTERMEDIATE IHC DURATION (n=28 818) |                     |                    |         | LONG IHC DURATION (n=31 709) |                     |                    |         |
|---------------------------------|-------------------------------|---------------------|--------------------|---------|--------------------------------------|---------------------|--------------------|---------|------------------------------|---------------------|--------------------|---------|
|                                 | Before IHC<br>N (%)           | During IHC<br>N (%) | After IHC<br>N (%) | p-value | Before IHC<br>N (%)                  | During IHC<br>N (%) | After IHC<br>N (%) | p-value | Before IHC<br>N (%)          | During IHC<br>N (%) | After IHC<br>N (%) | p-value |
| Accesses Number                 | 20 625                        | 2292                | 4500               |         | 19 362                               | 4779                | 4677               |         | 18.417                       | 10.438              | 2.854              |         |
| Accesses Mean                   | 2.1                           | 1.1                 | 1.5                |         | 2.0                                  | 1.3                 | 1.5                |         | 2.0                          | 1.8                 | 1.4                |         |
| <b>ED TRIAGE CODE</b>           |                               |                     |                    |         |                                      |                     |                    |         |                              |                     |                    |         |
| White (Non-urgent) <sup>a</sup> | 755 (3.7)                     | 27 (1.2)            | 139 (3.1)          |         | 927 (4.8)                            | 93 (1.9)            | 182 (3.9)          |         | 790 (4.3)                    | 228 (2.2)           | 111 (3.9)          |         |
| Green (Less urgent)             | 12 980 (62.9)                 | 1136 (49.6)         | 2374 (52.8)        | <0.001  | 12 028 (62.1)                        | 2714 (56.8)         | 2534 (54.1)        | <0.001  | 11 369 (61.7)                | 6136 (58.8)         | 1505 (52.7)        | <0.001  |
| Yellow (Urgent)                 | 6383 (30.9)                   | 921 (40.1)          | 1645 (36.6)        |         | 5879 (30.4)                          | 1696 (35.5)         | 1658 (35.5)        |         | 5641 (30.6)                  | 3599 (34.5)         | 1031 (36.1)        |         |
| Red (Immediate)                 | 507 (2.5)                     | 208 (9.1)           | 342 (7.6)          |         | 528 (2.7)                            | 276 (5.8)           | 303 (6.5)          |         | 617 (3.4)                    | 475 (4.5)           | 207 (7.3)          |         |
| <b>ED TRIAGE SYMPTOMS</b>       |                               |                     |                    |         |                                      |                     |                    |         |                              |                     |                    |         |
| Respiratory                     | 2169 (10.5)                   | 401 (17.5)          | 691 (15.4)         |         | 1831 (9.5)                           | 680 (14.2)          | 644 (13.8)         |         | 1740 (9.5)                   | 1378 (13.2)         | 460 (16.1)         |         |
| Abdominal pain                  | 1928 (9.4)                    | 151 (6.6)           | 303 (6.7)          | <0.001  | 1608 (8.3)                           | 326 (6.8)           | 347 (7.4)          | <0.001  | 1482 (8.1)                   | 725 (6.9)           | 204 (7.2)          | <0.001  |
| Neurological                    | 1322 (6.4)                    | 118 (5.2)           | 263 (5.8)          |         | 1354 (7.0)                           | 262 (5.5)           | 279 (6.0)          |         | 1236 (6.7)                   | 457 (4.4)           | 159 (5.6)          |         |
| Uro-gynaecological              | 1005 (4.9)                    | 70 (3.1)            | 198 (4.4)          |         | 822 (4.2)                            | 177 (3.7)           | 178 (3.8)          |         | 684 (3.7)                    | 473 (4.5)           | 100 (3.5)          |         |

|                                            |               |             |             |        |               |             |             |        |               |              |              |        |
|--------------------------------------------|---------------|-------------|-------------|--------|---------------|-------------|-------------|--------|---------------|--------------|--------------|--------|
| Fever                                      | 596 (2.9)     | 65 (2.8)    | 144 (3.2)   |        | 519 (2.7)     | 155 (3.2)   | 125 (2.7)   |        | 548 (3.0)     | 372 (3.6)    | 80 (2.8)     |        |
| Chest pain                                 | 532 (2.6)     | 20 (0.9)    | 122 (2.7)   |        | 466 (2.4)     | 75 (1.6)    | 112 (2.4)   |        | 464 (2.5)     | 187 (1.8)    | 64 (2.2)     |        |
| Unspecified symptoms                       | 11 568 (56.1) | 1354 (59.1) | 2430 (54.0) |        | 10 999 (56.9) | 2835 (59.3) | 2614 (55.9) |        | 10 627 (57.7) | 6228 (59.7)  | 1567 (54.9)  |        |
| Others                                     | 1492 (7.2)    | 111 (4.8)   | 348 (7.7)   |        | 1748 (9.0)    | 268 (5.6)   | 372 (7.9)   |        | 1628 (8.8)    | 615 (5.8)    | 219 (7.6)    |        |
| <b>DIAGNOSIS REGISTERED AT ED VISIT</b>    |               |             |             |        |               |             |             |        |               |              |              |        |
| Respiratory                                | 2465 (12.0)   | 376 (16.4)  | 719 (16.0)  |        | 2030 (10.5)   | 683 (14.3)  | 679 (14.5)  |        | 1922 (10.4)   | 1351 (12.9)  | 418 (14.6)   |        |
| Cardiovascular                             | 2618 (12.7)   | 199 (8.7)   | 477 (10.6)  |        | 2561 (13.2)   | 522 (10.9)  | 581 (12.4)  |        | 2542 (13.8)   | 997 (9.6)    | 342 (12.0)   |        |
| Digestive system                           | 1680 (8.1)    | 172 (7.5)   | 323 (7.2)   |        | 1592 (8.2)    | 368 (7.7)   | 341 (7.3)   |        | 1544 (8.4)    | 790 (7.6)    | 198 (6.9)    |        |
| Nervous system                             | 966 (4.7)     | 71 (3.1)    | 188 (4.3)   |        | 1075 (5.6)    | 206 (4.3)   | 269 (5.8)   |        | 941 (5.1)     | 502 (4.8)    | 157 (5.5)    |        |
| Genito-urinary                             | 1422 (6.9)    | 122 (5.3)   | 275 (6.1)   |        | 1121 (5.8)    | 247 (5.2)   | 264 (5.6)   |        | 1047 (5.7)    | 695 (6.7)    | 146 (5.1)    |        |
| Neoplasm                                   | 1071 (5.2)    | 191 (8.3)   | 262 (5.8)   |        | 767 (4.0)     | 296 (6.2)   | 207 (4.4)   |        | 588 (3.2)     | 373 (3.6)    | 127 (4.4)    |        |
| Blood diseases                             | 532 (2.6)     | 75 (3.3)    | 107 (2.4)   | <0.001 | 404 (2.1)     | 148 (3.1)   | 81 (1.7)    | <0.001 | 455 (2.5)     | 360 (3.4)    | 73 (2.6)     | <0.001 |
| Infectious diseases                        | 378 (1.8)     | 66 (2.9)    | 104 (2.3)   |        | 422 (2.2)     | 141 (3.0)   | 72 (1.5)    |        | 480 (2.6)     | 264 (2.5)    | 63 (2.2)     |        |
| Endocrine                                  | 587 (2.8)     | 109 (4.8)   | 123 (2.7)   |        | 540 (2.8)     | 201 (4.2)   | 136 (2.9)   |        | 576 (3.1)     | 339 (3.2)    | 87 (3.0)     |        |
| Osteo-muscular                             | 1095 (5.3)    | 49 (2.1)    | 147 (3.3)   |        | 1372 (7.1)    | 154 (3.2)   | 248 (5.3)   |        | 1274 (6.9)    | 391 (3.7)    | 122 (4.3)    |        |
| Mental health                              | 677 (3.3)     | 58 (2.5)    | 176 (3.9)   |        | 635 (3.3)     | 124 (2.6)   | 155 (3.3)   |        | 594 (3.2)     | 304 (2.9)    | 89 (3.1)     |        |
| Unspecified symptoms                       | 5167 (25.1)   | 575 (25.1)  | 1171 (26.0) |        | 4886 (25.2)   | 1213 (25.4) | 1162 (24.8) |        | 4609 (25.0)   | 2794 (26.8)  | 716 (25.1)   |        |
| Access to healthcare services              | 1040 (5.0)    | 130 (5.7)   | 229 (5.1)   |        | 939 (4.8)     | 274 (5.7)   | 256 (5.5)   |        | 892 (4.8)     | 673 (6.4)    | 157 (5.5)    |        |
| Others                                     | 1305 (6.3)    | 165 (7.1)   | 303 (6.7)   |        | 1440 (7.4)    | 343 (7.1)   | 299 (6.3)   |        | 1433 (7.7)    | 869 (8.3)    | 222 (7.7)    |        |
| <b>TIME OF ARRIVAL AT ED</b>               |               |             |             |        |               |             |             |        |               |              |              |        |
| 8:00AM-4:00PM                              | 12 119 (58.8) | 1235 (53.9) | 2474 (55.0) |        | 11 325 (58.5) | 2716 (56.9) | 2656 (56.8) |        | 10.720 (58.2) | 5.965 (57.1) | 1.653 (57.9) |        |
| 4:00PM-12:00PM                             | 5041 (24.4)   | 752 (32.8)  | 1165 (25.9) | <0.001 | 4831 (25.0)   | 1349 (28.2) | 1165 (24.9) | <0.001 | 4.661 (25.3)  | 2.724 (26.1) | 720 (25.2)   | 0.483  |
| 12:00PM-8:00AM                             | 3465 (16.8)   | 305 (13.3)  | 861 (19.1)  |        | 3206 (16.5)   | 714 (14.9)  | 856 (18.3)  |        | 3.036 (16.5)  | 1.749 (16.8) | 481 (16.9)   |        |
| <b>DESTINATION AFTER DISCHARGE FROM ED</b> |               |             |             |        |               |             |             |        |               |              |              |        |
| Hospital                                   | 9579 (46.4)   | 1278 (55.8) | 2383 (53.0) |        | 8773 (45.3)   | 2285 (47.8) | 2246 (48.1) |        | 8.660 (47.0)  | 4.354 (41.8) | 1.384 (48.5) |        |
| Home                                       | 10 747 (52.2) | 843 (36.8)  | 1777 (39.5) | <0.001 | 10 308 (53.2) | 2309 (48.3) | 2139 (45.7) | <0.001 | 9.489 (51.5)  | 5.811 (55.7) | 1.273 (44.6) | <0.001 |
| Other facility                             | 299 (1.4)     | 171 (7.4)   | 340 (7.5)   |        | 281 (1.5)     | 185 (3.9)   | 292 (6.2)   |        | 268 (1.5)     | 273 (2.5)    | 197 (6.9)    |        |

<sup>a</sup> White codes (Non-urgent) are often used during IHC for planned admission; ED = Emergency Department, IHC = Integrated Home Care
